# Supplementary material for: Research Progression of the Genus Merremia: A Comprehensive Review on the Nutritional Value, Ethnomedicinal Uses, Phytochemistry, Pharmacology, and Toxicity
Source: MDPI journal article supplement (doi:10.3390/plants10102070), 2021-09-30
Supplement: s1 [file s1]

**Table S1.** The full distribution listing of *Merremia* species around the world.

---

|                          |
|--------------------------|
| Angola                   |
| Australia                |
| Benin                    |
| Bangladesh               |
| Botswana                 |
| Brazil North             |
| Brazil Southeast         |
| Burundi                  |
| Burkina Faso             |
| Cameroon                 |
| Cambodia                 |
| Chad                     |
| Central African Republic |
| China North-Central      |
| China South-Central      |
| China Southeast          |
| Costa Rica               |
| Congo                    |
| Cuba                     |
| Dominican Republic       |
| Ethiopia                 |
| Fiji                     |
| France                   |
| Gambia                   |
| Gabon                    |
| Guatemala                |
| Ghana                    |
| Guinea                   |
| Guyana                   |
| Guinea-Bissau            |
| Haiti                    |
| Indonesia                |
| Ivory Coast              |
| India                    |
| Japan                    |
| Kiribati                 |
| Kenya                    |
| Lesotho                  |
| Laos                     |
| Liberia                  |
| Malawi                   |
| Madagascar               |
| Mali                     |
| Mauritius                |
| Mauritania               |
| Malaysia                 |
| Mexico Gulf              |
| Mexico Central           |
| Mexico Northeast         |
| Mexico Southeast         |

---

---

Mexico Southwest

Myanmar

Mozambique

Mongolia

Nepal

Namibia

Nicaragua

New Guinea

Niger

Nigeria

Panamá

Pakistan

Philippines

Russia

Rwanda Sierra Leone

Senegal

Solomon Island

South Africa

Sri Lanka

Somalia

Sudan

Suriname

Swaziland

Tanzania

Taiwan

Thailand

Togo

Uganda

Vietnam

Venezuela

Western Australia

Zaire

Zambia

Zimbabwe

---
